# Supplementary material for: Navigating predictions at nanoscale: a comprehensive study of regression models in magnetic nanoparticle synthesis
Source: Royal Society of Chemistry journal article supplement (doi:10.1039/d4tb02052a), 2024-01-01
Supplement: d4tb02052a1.pdf [file d4tb02052a1.pdf]

## ARTICLE

## Navigating Predictions at Nanoscale: A Comprehensive Study of Regression Models in Magnetic Nanoparticle Synthesis

Lukas Glänzer,<sup>a</sup> Lennart Göpfert<sup>a</sup>, Thomas Schmitz-Rode<sup>a</sup> and Ioana Slabu<sup>†a</sup>Received 00th January 20xx,  
Accepted 00th January 20xx

DOI: 10.1039/x0xx00000x

### S1 Dataset

The data for this study was extracted from a previously published synthesis setup<sup>1</sup>. Section 2.2.1 groups the data by type and offers brief descriptions of the individual system parameters. The following table gives the raw data before any manipulation by the described software.

| FeSO <sub>4</sub> -7H <sub>2</sub> O | FeCl <sub>3</sub> -6H <sub>2</sub> O | Iron Ion Ratio | V-IronSalts | NH <sub>3</sub> | pH | V-Base | Coating Type | V-Coating | T-IronSalts | T-Base | T-Coil | FR-IronSalts | FR-Base | FR-Coating | Coil length | Quenching Position | MNP Size |
|--------------------------------------|--------------------------------------|----------------|-------------|-----------------|----|--------|--------------|-----------|-------------|--------|--------|--------------|---------|------------|-------------|--------------------|----------|
| 0.01                                 | 0.015                                | 1.5            | 100         | 500             | 14 | 2      | LA           | 0.84      | RT          | RT     | RT     | 1.1667       | 5.8888  | -          | 10000       | -                  | 68.9     |
| 0.01                                 | 0.015                                | 1.5            | 100         | 500             | 14 | 2      | CA           | 28.824    | RT          | RT     | RT     | 1.1667       | 5.8888  | -          | 10000       | -                  | 15.8     |
| 0.01                                 | 0.015                                | 1.5            | 250         | 500             | 14 | 2      | LA           | 0.844     | RT          | RT     | RT     | 2.222        | 4.888   | -          | 10000       | -                  | 32.5     |
| 0.01                                 | 0.015                                | 1.5            | 250         | 500             | 14 | 2      | CA           | 28.824    | RT          | RT     | RT     | 2.222        | 4.888   | -          | 10000       | -                  | 15.7     |
| 0.01                                 | 0.015                                | 1.5            | 250         | 500             | 14 | 2      | CA           | 28.821    | RT          | RT     | RT     | 2.35         | 4.667   | 3.444      | 10000       | 10000              | 18.1     |
| 0.01                                 | 0.015                                | 1.5            | 250         | 500             | 14 | 2      | CA           | 28.82     | RT          | RT     | RT     | 2.4          | 4.644   | 3.25       | 10000       | 5000               | 14.9     |

1. Institute of Applied Medical Engineering, Helmholtz Institute, Medical Faculty, RWTH Aachen University, Germany Address here.

† Corresponding author: slabu@me.rwth-aachen.de; Tel.: +49 241 8089102

Supplementary Information available: [details of any supplementary information available should be included here]. See DOI: 10.1039/x0xx00000x

## ARTICLE

## Journal Name

|      |       |     |     |     |    |   |       |        |    |    |    |        |        |        |       |      |      |
|------|-------|-----|-----|-----|----|---|-------|--------|----|----|----|--------|--------|--------|-------|------|------|
| 0.01 | 0.015 | 1.5 | 250 | 500 | 14 | 2 | CA    | 28.822 | RT | RT | RT | 2.333  | 4.78   | 3.411  | 10000 | 35   | 4.3  |
| 0.01 | 0.015 | 1.5 | 250 | 500 | 14 | 2 | CA    | 28.824 | RT | RT | RT | 2.4    | 4.644  | 3.444  | 10000 | 5000 | -    |
| 0.01 | 0.015 | 1.5 | 250 | 500 | 14 | 2 | CA    | 28.824 | RT | RT | RT | 2.4    | 4.644  | 3.444  | 10000 | 5000 | 24.2 |
| 0.01 | 0.015 | 1.5 | 250 | 500 | 14 | 2 | CA    | 28.824 | RT | RT | RT | 2.4    | 4.644  | 3.444  | 10000 | 5000 | 19.6 |
| 0.01 | 0.015 | 1.5 | 250 | 500 | 14 | 2 | CA    | 28.824 | RT | RT | RT | 2.4    | 4.644  | 3.444  | 10000 | 5000 | 21   |
| 0.01 | 0.015 | 1.5 | 250 | 500 | 14 | 2 | CA    | 28.824 | RT | RT | RT | 2.4    | 4.644  | 3.444  | 10000 | 5000 | 14.3 |
| 0.01 | 0.015 | 1.5 | 250 | 500 | 14 | 2 | CA    | 28.824 | RT | RT | RT | 2.4    | 4.644  | 3.444  | 10000 | 5000 | 19.7 |
| 0.01 | 0.015 | 1.5 | 250 | 500 | 14 | 2 | CA    | 28.821 | RT | RT | RT | 2.4    | 4.644  | 3.444  | 10000 | 5000 | -    |
| 0.01 | 0.015 | 1.5 | 250 | 500 | 14 | 2 | CA    | 28.821 | RT | RT | RT | 2.4    | 4.644  | 3.444  | 10000 | 5000 | 16.5 |
| 0.01 | 0.015 | 1.5 | 250 | 500 | 14 | 2 | CA    | 28.821 | RT | RT | RT | 2.4    | 4.644  | 3.444  | 10000 | 5000 | 14.7 |
| 0.01 | 0.015 | 1.5 | 250 | 500 | 14 | 2 | CA    | 28.821 | RT | RT | RT | 2.4    | 4.644  | 3.444  | 10000 | 5000 | 13.1 |
| 0.01 | 0.015 | 1.5 | 250 | 500 | 14 | 2 | CA    | 28.821 | RT | RT | RT | 2.4    | 4.644  | 3.444  | 10000 | 5000 | 12.4 |
| 0.01 | 0.015 | 1.5 | 250 | 500 | 14 | 2 | CA    | 28.821 | RT | RT | RT | 2.4    | 4.644  | 3.444  | 10000 | 5000 | 11.4 |
| 0.01 | 0.015 | 1.5 | 250 | 500 | 14 | 2 | CA    | 28.821 | RT | RT | RT | 2.4    | 4.644  | 3.444  | 10000 | 5000 | 9.3  |
| 0.04 | 0.06  | 1.5 | 250 | 500 | 14 | 2 | CA    | 28.821 | RT | RT | RT | 2.4    | 4.644  | 3.444  | 10000 | 5000 | -    |
| 0.04 | 0.06  | 1.5 | 250 | 500 | 14 | 2 | CA    | 28.821 | RT | RT | RT | 2.4    | 4.644  | 3.444  | 10000 | 5000 | 10.7 |
| 0.04 | 0.06  | 1.5 | 250 | 500 | 14 | 2 | CA    | 28.821 | RT | RT | RT | 2.4    | 4.644  | 3.444  | 10000 | 5000 | -    |
| 0.04 | 0.06  | 1.5 | 250 | 500 | 14 | 2 | CA    | 28.821 | RT | RT | RT | 2.4    | 4.644  | 3.444  | 10000 | 5000 | -    |
| 0.04 | 0.06  | 1.5 | 250 | 500 | 14 | 2 | CA    | 28.821 | RT | RT | RT | 2.4    | 4.644  | 3.444  | 10000 | 5000 | 10.8 |
| 0.04 | 0.06  | 1.5 | 250 | 500 | 14 | 2 | CA    | 28.821 | RT | RT | RT | 2.4    | 4.644  | 3.444  | 10000 | 5000 | -    |
| 0.04 | 0.06  | 1.5 | 250 | 500 | 14 | 2 | CA    | 28.821 | RT | RT | RT | 2.4    | 4.644  | 3.444  | 10000 | 5000 | -    |
| 0.01 | 0.015 | 1.5 | 250 | 500 | 14 | 2 | Na-CA | 44.118 | RT | RT | RT | 2.4    | 4.644  | 3.444  | 10000 | 5000 | -    |
| 0.01 | 0.015 | 1.5 | 250 | 500 | 14 | 2 | Na-CA | 44.118 | RT | RT | RT | 2.4    | 4.644  | 3.444  | 10000 | 5000 | -    |
| 0.01 | 0.015 | 1.5 | 250 | 500 | 14 | 2 | Na-CA | 44.118 | RT | RT | RT | 2.4    | 4.644  | 3.444  | 10000 | 5000 | 49.8 |
| 0.01 | 0.015 | 1.5 | 250 | 500 | 14 | 2 | Na-CA | 44.118 | RT | RT | RT | 2.4    | 4.644  | 3.444  | 10000 | 5000 | -    |
| 0.01 | 0.015 | 1.5 | 250 | 500 | 14 | 2 | Na-CA | 44.118 | RT | RT | RT | 2.4    | 4.644  | 3.444  | 10000 | 5000 | -    |
| 0.01 | 0.015 | 1.5 | 250 | 500 | 14 | 2 | Na-CA | 44.118 | RT | RT | RT | 2.4    | 4.644  | 3.444  | 10000 | 5000 | 14.6 |
| 0.01 | 0.015 | 1.5 | 250 | 500 | 14 | 2 | Na-CA | 44.118 | RT | RT | RT | 2.4    | 4.644  | 3.444  | 10000 | 5000 | -    |
| 0.01 | 0.015 | 1.5 | 250 | 500 | 14 | 2 | Na-CA | 44.118 | RT | RT | RT | 2.4    | 4.644  | 3.444  | 10000 | 5000 | -    |
| 0.01 | 0.015 | 1.5 | 250 | 500 | 14 | 2 | CA    | 28.821 | RT | RT | RT | 2.3241 | 4.8056 | 3.4999 | 10000 | 2500 | -    |
| 0.01 | 0.015 | 1.5 | 250 | 500 | 14 | 2 | CA    | 28.821 | RT | RT | RT | 2.3241 | 4.8056 | 3.4999 | 10000 | 2500 | -    |
| 0.01 | 0.015 | 1.5 | 250 | 500 | 14 | 2 | CA    | 28.821 | RT | RT | RT | 2.3241 | 4.8056 | 3.4999 | 10000 | 2500 | 13.5 |
| 0.01 | 0.015 | 1.5 | 250 | 500 | 14 | 2 | CA    | 28.821 | RT | RT | RT | 2.3241 | 4.8056 | 3.4999 | 10000 | 2500 | -    |

Journal Name

ARTICLE

|      |       |     |     |     |    |   |    |        |    |    |    |        |       |       |       |       |        |
|------|-------|-----|-----|-----|----|---|----|--------|----|----|----|--------|-------|-------|-------|-------|--------|
| 0.01 | 0.015 | 1.5 | 250 | 500 | 14 | 2 | CA | 10.664 | RT | RT | RT | 2.4    | 4.644 | 3.25  | 10000 | 5000  | -      |
| 0.01 | 0.015 | 1.5 | 250 | 500 | 14 | 2 | CA | 10.664 | RT | RT | RT | 2.4    | 4.644 | 3.25  | 10000 | 5000  | 14.5   |
| 0.01 | 0.015 | 1.5 | 250 | 500 | 14 | 2 | CA | 10.664 | RT | RT | RT | 2.4    | 4.644 | 3.25  | 10000 | 5000  | 12.9   |
| 0.01 | 0.015 | 1.5 | 250 | 500 | 14 | 2 | CA | 10.664 | RT | RT | RT | 2.4    | 4.644 | 3.25  | 10000 | 5000  | 12.2   |
| 0.01 | 0.015 | 1.5 | 250 | 500 | 14 | 2 | CA | 10.664 | RT | RT | RT | 2.4    | 4.644 | 3.25  | 10000 | 5000  | 10.351 |
| 0.01 | 0.015 | 1.5 | 250 | 500 | 14 | 2 | CA | 10.664 | RT | RT | RT | 2.4    | 4.644 | 3.25  | 10000 | 5000  | 8.7    |
| 0.01 | 0.015 | 1.5 | 250 | 500 | 14 | 2 | CA | 10.664 | RT | RT | RT | 2.4    | 4.644 | 3.25  | 10000 | 5000  | 8.8    |
| 0.01 | 0.015 | 1.5 | 250 | 500 | 14 | 2 | CA | 10.664 | RT | RT | RT | 2.4    | 4.644 | 3.25  | 10000 | 5000  | 14.3   |
| 0.01 | 0.015 | 1.5 | 250 | 500 | 14 | 2 | CA | 1.065  | RT | RT | RT | 2.4    | 4.644 | 3.25  | 10000 | 5000  | -      |
| 0.01 | 0.015 | 1.5 | 250 | 500 | 14 | 2 | CA | 1.065  | RT | RT | RT | 2.4    | 4.644 | 3.25  | 10000 | 5000  | 13.5   |
| 0.01 | 0.015 | 1.5 | 250 | 500 | 14 | 2 | CA | 1.065  | RT | RT | RT | 2.4    | 4.644 | 3.25  | 10000 | 5000  | 17.5   |
| 0.01 | 0.015 | 1.5 | 250 | 500 | 14 | 2 | CA | 1.065  | RT | RT | RT | 2.4    | 4.644 | 3.25  | 10000 | 5000  | 15.9   |
| 0.01 | 0.015 | 1.5 | 250 | 500 | 14 | 2 | CA | 1.065  | RT | RT | RT | 2.4    | 4.644 | 3.25  | 10000 | 5000  | 15.1   |
| 0.01 | 0.015 | 1.5 | 250 | 500 | 14 | 2 | CA | 1.065  | RT | RT | RT | 2.4    | 4.644 | 3.25  | 10000 | 5000  | 14.2   |
| 0.01 | 0.015 | 1.5 | 250 | 500 | 14 | 2 | CA | 1.065  | RT | RT | RT | 2.4    | 4.644 | 3.25  | 10000 | 5000  | 13.7   |
| 0.01 | 0.015 | 1.5 | 250 | 500 | 14 | 2 | CA | 1.065  | RT | RT | RT | 2.4    | 4.644 | 3.25  | 10000 | 5000  | 36     |
| 0.01 | 0.015 | 1.5 | 250 | 500 | 14 | 2 | CA | 28.819 | RT | RT | RT | 2.3148 | 4.74  | 3.407 | 10000 | 10000 | -      |
| 0.01 | 0.015 | 1.5 | 250 | 500 | 14 | 2 | CA | 28.819 | RT | RT | RT | 2.3148 | 4.74  | 3.407 | 10000 | 10000 | -      |
| 0.01 | 0.015 | 1.5 | 250 | 500 | 14 | 2 | CA | 28.819 | RT | RT | RT | 2.3148 | 4.74  | 3.407 | 10000 | 10000 | 14.8   |
| 0.01 | 0.015 | 1.5 | 250 | 500 | 14 | 2 | CA | 28.819 | RT | RT | RT | 2.3148 | 4.74  | 3.407 | 10000 | 10000 | -      |
| 0.01 | 0.015 | 1.5 | 250 | 500 | 14 | 2 | CA | 28.818 | RT | RT | RT | 2.333  | 4.722 | 3.574 | 10000 | 5000  | -      |
| 0.01 | 0.015 | 1.5 | 250 | 500 | 14 | 2 | CA | 28.818 | RT | RT | RT | 2.333  | 4.722 | 3.574 | 10000 | 5000  | -      |
| 0.01 | 0.015 | 1.5 | 250 | 500 | 14 | 2 | CA | 28.818 | RT | RT | RT | 2.333  | 4.722 | 3.574 | 10000 | 5000  | 16.4   |
| 0.01 | 0.015 | 1.5 | 250 | 500 | 14 | 2 | CA | 28.818 | RT | RT | RT | 2.333  | 4.722 | 3.574 | 10000 | 5000  | -      |
| 0.01 | 0.015 | 1.5 | 250 | 500 | 14 | 2 | CA | 28.824 | RT | RT | RT | 2.287  | 4.694 | 3.472 | 10000 | 2500  | -      |
| 0.01 | 0.015 | 1.5 | 250 | 500 | 14 | 2 | CA | 28.824 | RT | RT | RT | 2.287  | 4.694 | 3.472 | 10000 | 2500  | -      |
| 0.01 | 0.015 | 1.5 | 250 | 500 | 14 | 2 | CA | 28.824 | RT | RT | RT | 2.287  | 4.694 | 3.472 | 10000 | 2500  | 16.1   |
| 0.01 | 0.015 | 1.5 | 250 | 500 | 14 | 2 | CA | 28.824 | RT | RT | RT | 2.287  | 4.694 | 3.472 | 10000 | 2500  | -      |
| 0.01 | 0.015 | 1.5 | 250 | 500 | 14 | 2 | CA | 28.821 | RT | RT | RT | 2.315  | 4.63  | 3.444 | 10000 | 70    | -      |
| 0.01 | 0.015 | 1.5 | 250 | 500 | 14 | 2 | CA | 28.821 | RT | RT | RT | 2.315  | 4.63  | 3.444 | 10000 | 70    | 7      |
| 0.01 | 0.015 | 1.5 | 250 | 500 | 14 | 2 | CA | 28.821 | RT | RT | RT | 2.32   | 4.63  | 3.444 | 10000 | 70    | -      |
| 0.01 | 0.015 | 1.5 | 250 | 500 | 14 | 2 | CA | 28.821 | RT | RT | RT | 2.315  | 4.63  | 3.444 | 10000 | 70    | -      |
| 0.01 | 0.015 | 1.5 | 250 | 500 | 14 | 2 | CA | 28.19  | RT | RT | RT | 2.333  | 4.78  | 3.411 | 10000 | 70    | 4      |

## ARTICLE

## Journal Name

|      |       |     |     |     |    |   |      |       |    |    |    |       |       |       |       |      |          |
|------|-------|-----|-----|-----|----|---|------|-------|----|----|----|-------|-------|-------|-------|------|----------|
| 0.01 | 0.015 | 1.5 | 250 | 500 | 14 | 2 | TEOS | 46.7  | RT | RT | RT | 2.333 | 4.722 | 3.574 | 10000 | 5000 | -        |
| 0.01 | 0.015 | 1.5 | 250 | 500 | 14 | 2 | TEOS | 46.7  | RT | RT | RT | 2.333 | 4.722 | 3.574 | 10000 | 5000 | -        |
| 0.01 | 0.015 | 1.5 | 250 | 500 | 14 | 2 | CA   | 2.643 | RT | RT | RT | 2.4   | 4.644 | 3.25  | 10000 | 5000 | -        |
| 0.01 | 0.015 | 1.5 | 250 | 500 | 14 | 2 | CA   | 2.643 | RT | RT | RT | 2.4   | 4.644 | 3.25  | 10000 | 5000 | -        |
| 0.01 | 0.015 | 1.5 | 250 | 500 | 14 | 2 | CA   | 2.643 | RT | RT | RT | 2.4   | 4.644 | 3.25  | 10000 | 5000 | 17.3     |
| 0.01 | 0.015 | 1.5 | 250 | 500 | 14 | 2 | CA   | 2.643 | RT | RT | RT | 2.4   | 4.644 | 3.25  | 10000 | 5000 | 10.8     |
| 0.01 | 0.015 | 1.5 | 250 | 500 | 14 | 2 | CA   | 2.643 | RT | RT | RT | 2.4   | 4.644 | 3.25  | 10000 | 5000 | 10.4     |
| 0.01 | 0.015 | 1.5 | 250 | 500 | 14 | 2 | CA   | 2.643 | RT | RT | RT | 2.4   | 4.644 | 3.25  | 10000 | 5000 | -        |
| 0.01 | 0.015 | 1.5 | 250 | 500 | 14 | 2 | CA   | 2.642 | RT | RT | RT | 2.4   | 4.644 | 3.25  | 10000 | 5000 | -        |
| 0.01 | 0.015 | 1.5 | 250 | 500 | 14 | 2 | CA   | 2.642 | RT | RT | RT | 2.4   | 4.644 | 3.25  | 10000 | 5000 | -        |
| 0.01 | 0.015 | 1.5 | 250 | 500 | 14 | 2 | CA   | 2.642 | RT | RT | RT | 2.4   | 4.644 | 3.25  | 10000 | 5000 | 10.8     |
| 0.01 | 0.015 | 1.5 | 250 | 500 | 14 | 2 | CA   | 2.642 | RT | RT | RT | 2.4   | 4.644 | 3.25  | 10000 | 5000 | 10.8     |
| 0.01 | 0.015 | 1.5 | 250 | 500 | 14 | 2 | CA   | 2.642 | RT | RT | RT | 2.4   | 4.644 | 3.25  | 10000 | 5000 | 10.8     |
| 0.01 | 0.015 | 1.5 | 250 | 500 | 14 | 2 | CA   | 2.642 | RT | RT | RT | 2.4   | 4.644 | 3.25  | 10000 | 5000 | 10.8     |
| 0.01 | 0.015 | 1.5 | 250 | 500 | 14 | 2 | CA   | 2.642 | RT | RT | RT | 2.4   | 4.644 | 3.25  | 10000 | 5000 | 10.8     |
| 0.01 | 0.015 | 1.5 | 250 | 500 | 14 | 2 | CA   | 2.642 | RT | RT | RT | 2.4   | 4.644 | 3.25  | 10000 | 5000 | 10.8     |
| 0.01 | 0.015 | 1.5 | 250 | 500 | 14 | 2 | CA   | 2.642 | RT | RT | RT | 2.4   | 4.644 | 3.25  | 10000 | 5000 | 10.9     |
| 0.01 | 0.015 | 1.5 | 250 | 500 | 14 | 2 | CA   | 2.642 | RT | RT | RT | 2.4   | 4.644 | 3.25  | 10000 | 5000 | 10.9     |
| 0.01 | 0.015 | 1.5 | 250 | 500 | 14 | 2 | CA   | 2.642 | RT | RT | RT | 2.4   | 4.644 | 3.25  | 10000 | 5000 | 10.9     |
| 0.01 | 0.015 | 1.5 | 250 | 500 | 14 | 2 | CA   | 2.642 | RT | RT | RT | 2.4   | 4.644 | 3.25  | 10000 | 5000 | 10.9     |
| 0.01 | 0.015 | 1.5 | 250 | 500 | 14 | 2 | CA   | 2.642 | RT | RT | RT | 2.4   | 4.644 | 3.25  | 10000 | 5000 | 10.9     |
| 0.01 | 0.015 | 1.5 | 250 | 500 | 14 | 2 | CA   | 2.642 | RT | RT | RT | 2.4   | 4.644 | 3.25  | 10000 | 5000 | 10.9     |
| 0.01 | 0.015 | 1.5 | 250 | 500 | 14 | 2 | CA   | 2.642 | RT | RT | RT | 2.4   | 4.644 | 3.25  | 10000 | 5000 | 10.9     |
| 0.01 | 0.015 | 1.5 | 250 | 500 | 14 | 2 | CA   | 2.642 | RT | RT | RT | 2.4   | 4.644 | 3.25  | 10000 | 5000 | 10.9     |
| 0.01 | 0.015 | 1.5 | 250 | 500 | 14 | 2 | CA   | 2.642 | RT | RT | RT | 2.4   | 4.644 | 3.25  | 10000 | 5000 | 10.9     |
| 0.01 | 0.015 | 1.5 | 250 | 500 | 14 | 2 | CA   | 2.642 | RT | RT | RT | 2.4   | 4.644 | 3.25  | 10000 | 5000 | 10.9     |
| 0.01 | 0.015 | 1.5 | 250 | 500 | 14 | 2 | CA   | 2.643 | RT | RT | RT | 2.4   | 4.644 | 3.25  | 10000 | 5000 | -        |
| 0.01 | 0.015 | 1.5 | 250 | 500 | 14 | 2 | CA   | 2.643 | RT | RT | RT | 2.4   | 4.644 | 3.25  | 10000 | 5000 | 10.5     |
| 0.01 | 0.015 | 1.5 | 250 | 500 | 14 | 2 | CA   | 1.906 | RT | RT | RT | 0.817 | 2.347 | 1.939 | 10000 | 5000 | 34.97    |
| 0.01 | 0.015 | 1.5 | 250 | 500 | 14 | 2 | CA   | 1.5   | RT | RT | RT | 2.01  | 4.902 | 3.696 | 10000 | 5000 | 21.425   |
| 0.01 | 0.015 | 1.5 | 250 | 500 | 14 | 2 | CA   | 3     | RT | RT | RT | 2.033 | 4.065 | 3.472 | 10000 | 5000 | 16.64    |
| 0.01 | 0.015 | 1.5 | 250 | 500 | 14 | 2 | CA   | 1     | RT | RT | RT | 1.969 | 3.567 | 3.307 | 10000 | 2500 | 21.95    |
| 0.01 | 0.015 | 1.5 | 250 | 500 | 14 | 2 | CA   | 2.645 | RT | RT | RT | 1.982 | 4.425 | 3.628 | 10000 | 2500 | 19.28    |
| 0.01 | 0.015 | 1.5 | 250 | 500 | 14 | 2 | CA   | 2.642 | RT | RT | RT | 0.922 | 1.445 | 2.041 | 10000 | 2500 | 28.70089 |
| 0.01 | 0.015 | 1.5 | 250 | 500 | 14 | 2 | CA   | 1.075 | RT | RT | RT | 1.908 | 3.252 | 3.58  | 10000 | 70   | 20.655   |
| 0.01 | 0.015 | 1.5 | 250 | 500 | 14 | 2 | CA   | 25.07 | RT | RT | RT | 2.049 | 3.254 | 3.082 | 10000 | 70   | 90.21    |
| 0.01 | 0.015 | 1.5 | 250 | 500 | 14 | 2 | CA   | 1.07  | RT | RT | RT | 1.25  | 1.115 | 2.26  | 10000 | 70   | 6.214    |

Journal Name

ARTICLE

|      |       |     |     |     |    |   |    |      |    |    |    |       |       |       |       |       |         |
|------|-------|-----|-----|-----|----|---|----|------|----|----|----|-------|-------|-------|-------|-------|---------|
| 0.01 | 0.015 | 1.5 | 250 | 500 | 14 | 2 | CA | 2.64 | RT | RT | RT | 2.016 | 2.258 | 3.315 | 10000 | 70    | 7.44    |
| 0.01 | 0.015 | 1.5 | 250 | 500 | 14 | 2 | CA | 2.64 | RT | RT | RT | 2.252 | 4.486 | 3.559 | 10000 | 10000 | 34.3304 |
| 0.01 | 0.015 | 1.5 | 250 | 500 | 14 | 2 | CA | 2.64 | RT | RT | RT | 1.366 | 2.35  | 2.448 | 10000 | 10000 | 17.0923 |
| 0.01 | 0.015 | 1.5 | 250 | 500 | 14 | 2 | CA | 1.07 | RT | RT | RT | 1.453 | 1.779 | 2.267 | 10000 | 10000 | 55.7068 |
| 0.01 | 0.015 | 1.5 | 250 | 500 | 14 | 2 | CA | 1.07 | RT | RT | RT | 1.936 | 4.587 | 3.394 | 10000 | 10000 | 50.53   |
| 0.01 | 0.015 | 1.5 | 250 | 500 | 14 | 2 | CA | 1.07 | RT | RT | RT | 2.429 | 5.952 | 3.893 | 10000 | 10000 | 58.4751 |
| 0.01 | 0.015 | 1.5 | 250 | 500 | 14 | 2 | CA | 1.07 | RT | RT | RT | -     | -     | -     | 10000 | 2500  | 13.87   |
| 0.01 | 0.015 | 1.5 | 250 | 500 | 14 | 2 | CA | 1.07 | RT | RT | RT | 2.083 | 3.042 | 3.633 | 10000 | 5000  | 13.87   |

## S2 PCA Plots

The following PCA plots show the prediction surfaces of each presented method and the predictions of the data set by each model as red spheres. These visualizations further show the different prediction accuracies of the models.

PCA Projection - Ridge

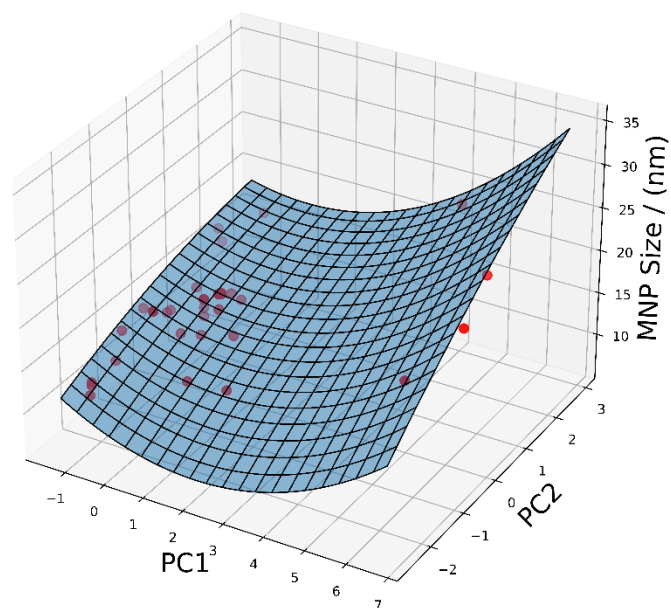

PCA Projection - Ridge

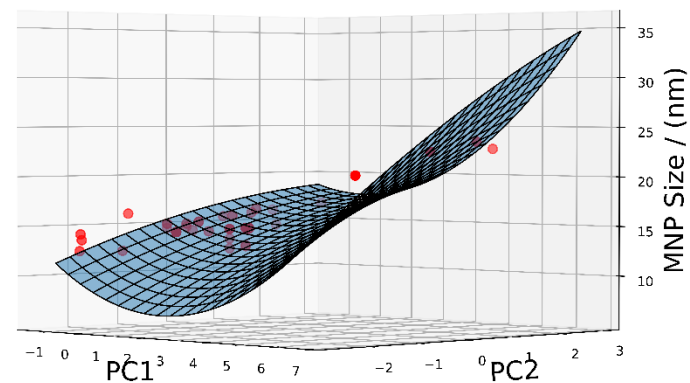

S2.A: PCA plot for Ridge Regression.

PCA Projection - Lasso

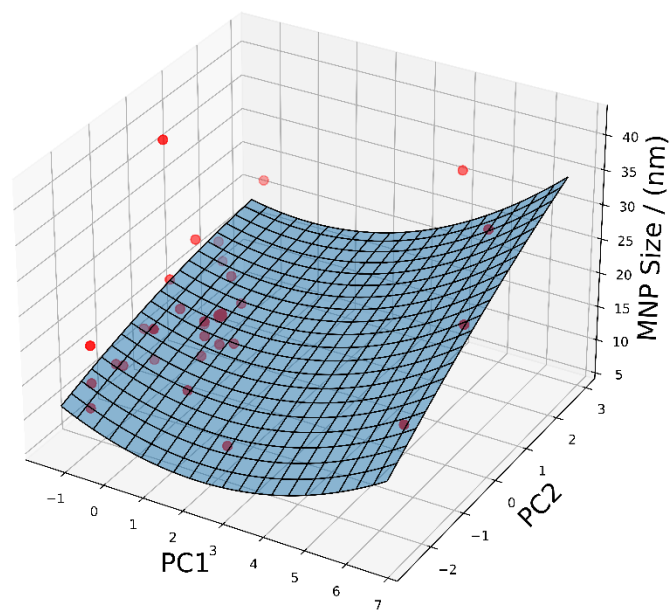

PCA Projection - Lasso

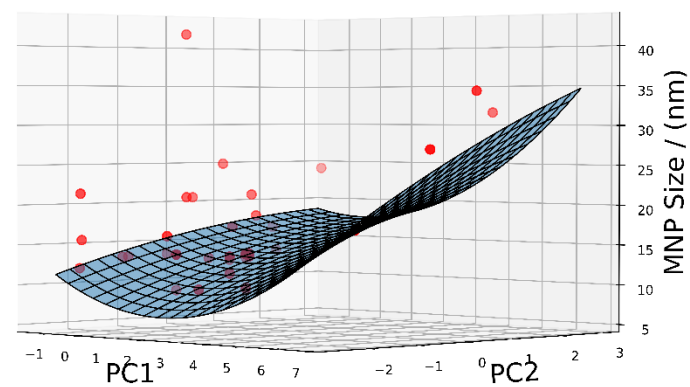

S2.B: PCA plot for Lasso Regression.

PCA Projection - Elastic Net



PCA Projection - Elastic Net

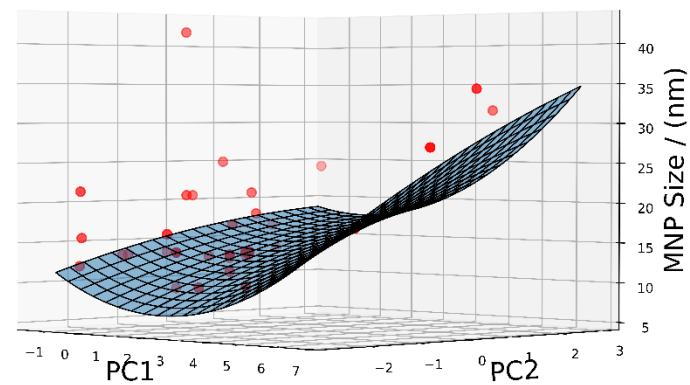

S2.C: PCA plot for Elastic Net Regression.



PCA Projection - Decision Tree

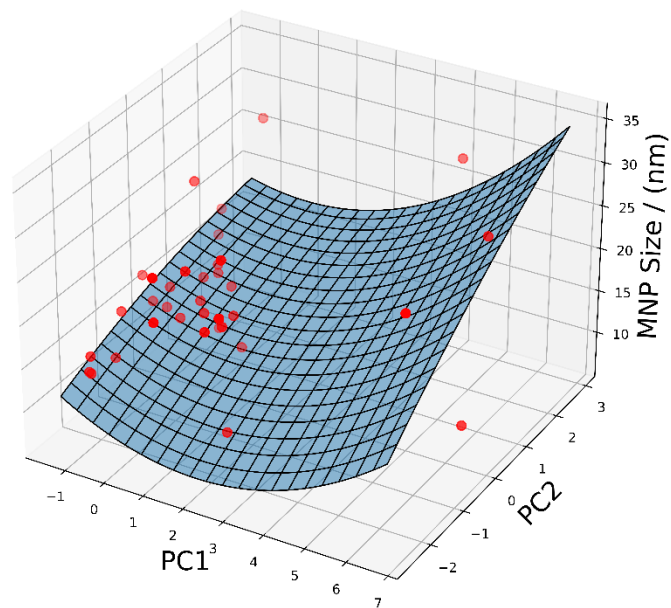

PCA Projection - Decision Tree

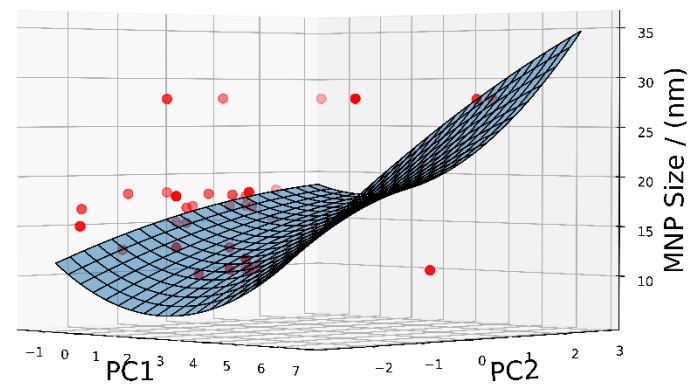

S2.D: PCA plot for Decision Tree Regression.

PCA Projection - Random Forest

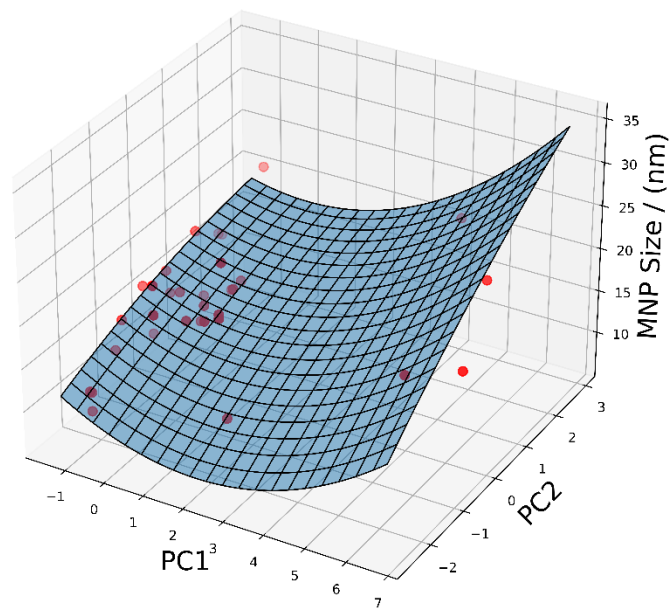

PCA Projection - Random Forest

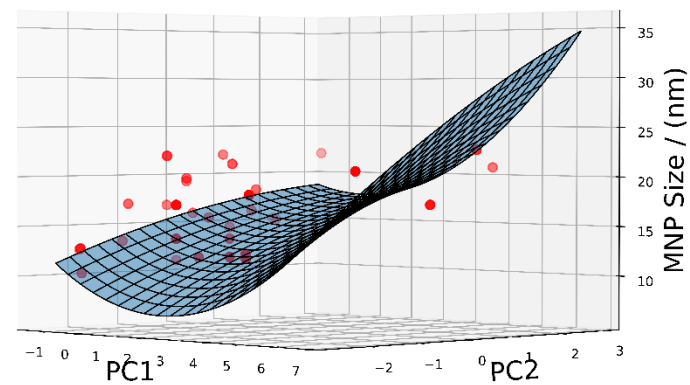

S2.E: PCA plot for Lasso Regression.

PCA Projection - Support Vector

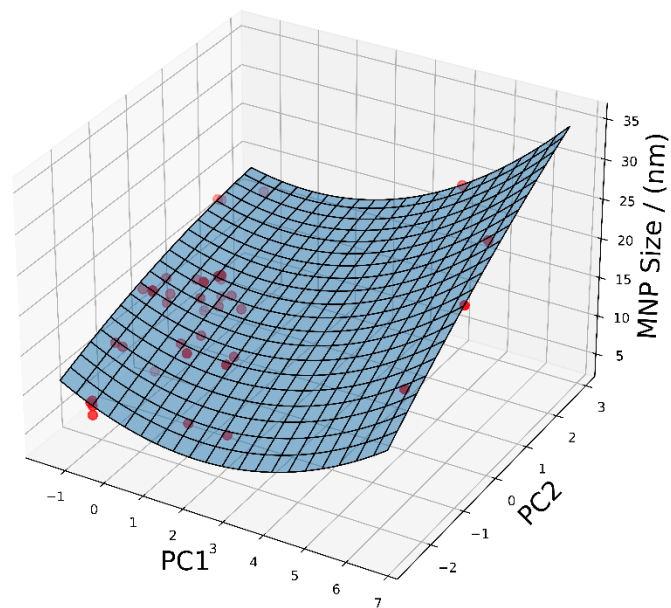

PCA Projection - Support Vector

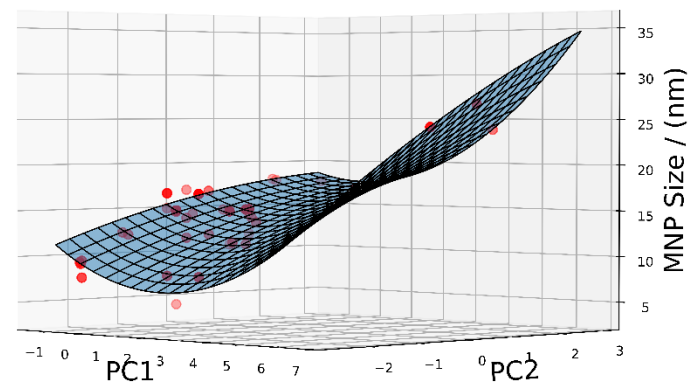

S2.F: PCA plot for Support Vector Regression.

PCA Projection - Gradient Boosting

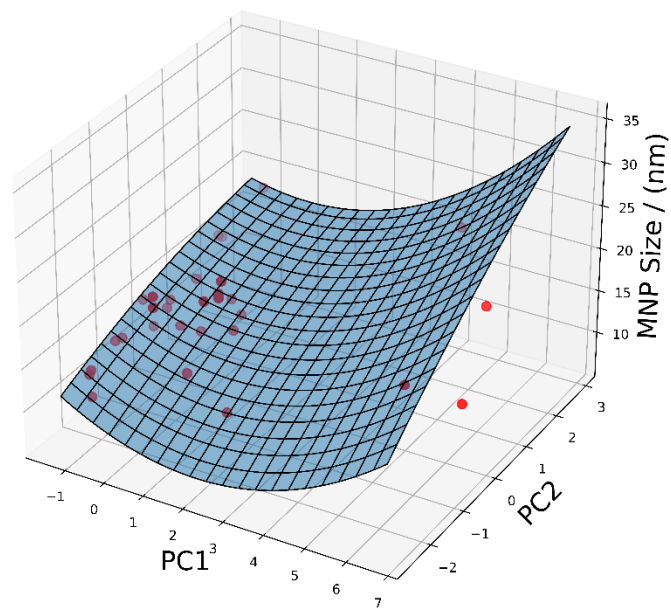

PCA Projection - Gradient Boosting

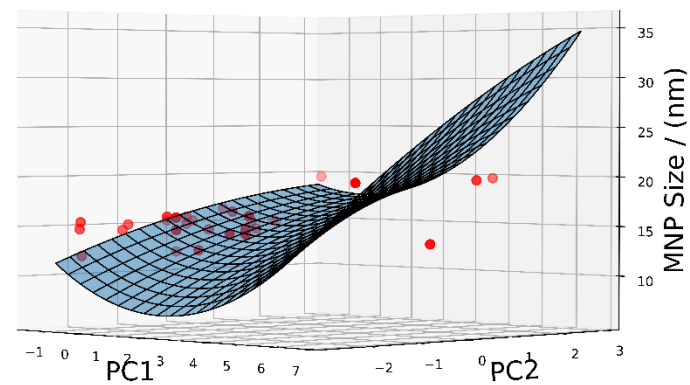

S2.G: PCA plot for Gradient Boosting Regression.

PCA Projection - Multilayer Perceptron

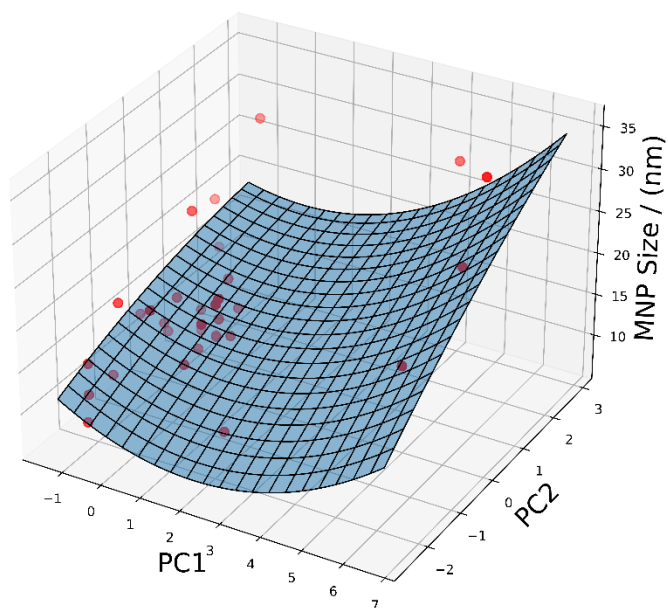

PCA Projection - Multilayer Perceptron

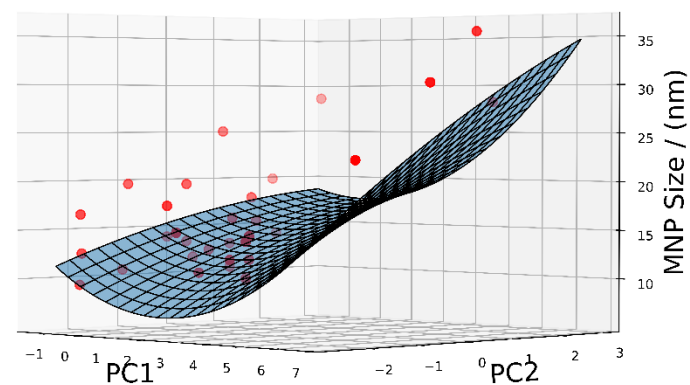

S2.H: PCA plot for Multilayer Perceptron Regression.

## Notes and references

- 1 L. Göpfert, M. Schoenen, E. M. Buhl, T. Weirich, T. Schmitz-Rode and I. Slabu, A modularly built, scalable, and continuous millifluidic process enabling the synthesis of magnetic nanoparticles tailored for biomedical applications, *Chemical Engineering Journal*, 2024.
